# Supplementary material for: Effects of ambient noise on zebra finch vigilance and foraging efficiency
Source: PubMed Central journal article supplement (PMC6312262; doi:10.1371/journal.pone.0209471), 2018-12-31
Supplement: pone.0209471.s004.pdf [file pone.0209471.s004.pdf]

| Model ID        | Candidate models                 | AICc        | $\Delta$ AICc | df       | Weight   |
|-----------------|----------------------------------|-------------|---------------|----------|----------|
| Full            | Snd+Tr+Age+Snd:Tr+Snd:Age+Tr:Age | 43.2        | 32.47         | 9        |          |
| <b>1 (Null)</b> |                                  | <b>10.7</b> | <b>0</b>      | <b>3</b> | <b>1</b> |

*Snd*: Treatment type, *Tr*: Trial number, *Age*
