# Supplementary material for: Effects of ambient noise on zebra finch vigilance and foraging efficiency
Source: PubMed Central journal article supplement (PMC6312262; doi:10.1371/journal.pone.0209471), 2018-12-31
Supplement: pone.0209471.s005.pdf [file pone.0209471.s005.pdf]

| Model ID | Candidate models | AICc | $\Delta$ AICc | df       | Weight       |
|----------|------------------|------|---------------|----------|--------------|
| Full     | Tr+Age+Tr:Age    | 50.8 | 2.66          | 5        | 0            |
| <b>1</b> | <b>Tr+Age</b>    | 48.1 | <b>0</b>      | <b>4</b> | <b>0.533</b> |
| 2        | Tr               | 48.4 | 0.26          | 3        | 0.467        |

*Tr*: Trial number, *Age*
