# Supplementary material for: Effects of ambient noise on zebra finch vigilance and foraging efficiency
Source: PubMed Central journal article supplement (PMC6312262; doi:10.1371/journal.pone.0209471), 2018-12-31
Supplement: pone.0209471.s006.pdf [file pone.0209471.s006.pdf]

| Model ID | Candidate models                 | AICc  | $\Delta$ AICc | df       | Weight       |
|----------|----------------------------------|-------|---------------|----------|--------------|
| Full     | Snd+Tr+Age+Snd:Tr+Snd:Age+Tr:Age | -1.2  | 18.27         | 9        |              |
| <b>1</b> | <b>Snd</b>                       | -19.5 | <b>0</b>      | <b>4</b> | <b>0.692</b> |
| 2        | Snd+Tr                           | -17.8 | 1.62          | 5        | 0.308        |

*Snd*: Treatment type, *Tr* :Trial number, *Age*
